# Supplementary material for: Hydrogen-bond-modulated negative linear compressibility in a V-shaped molecular crystal
Source: Royal Society of Chemistry journal article supplement (doi:10.1039/d4cp01102c), 2024-01-01
Supplement: d4cp01102c1.pdf [file d4cp01102c1.pdf]

## Hydrogen Bond-Modulated Negative Linear Compressibility in a V-shaped Molecular Crystal

Qingxin Zeng,<sup>\*a</sup> Wenbo Qiu,<sup>a</sup> Chengxi Li,<sup>a</sup> Yan sun,<sup>a</sup> Jian Hao,<sup>a</sup> and Yinwei Li<sup>\*a</sup>

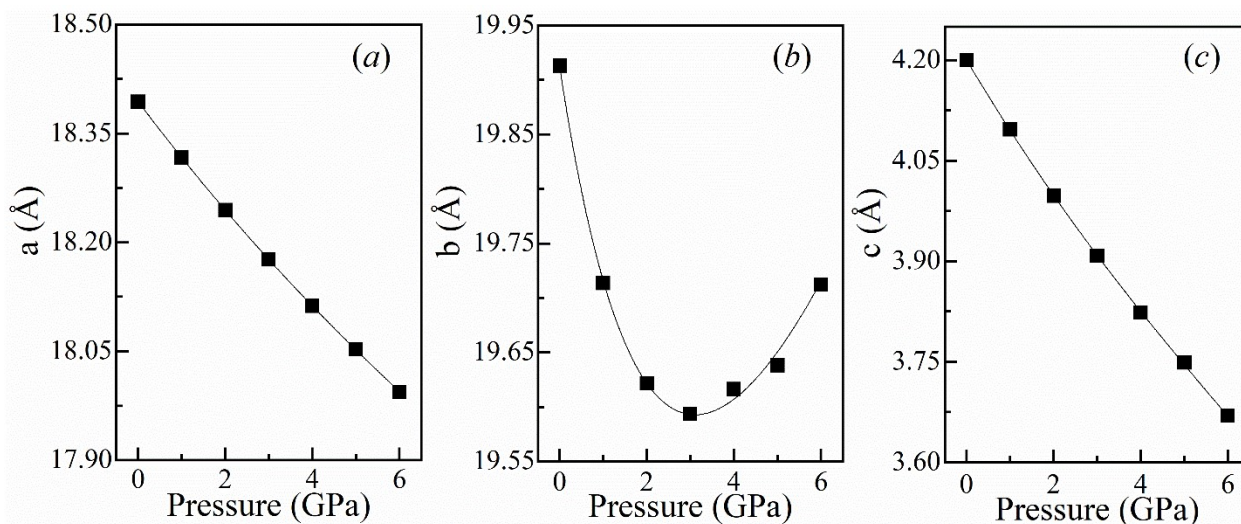

Fig. S1. Lattice parameters as a function of pressure from 0 to 6 GPa. The scatter solid points are computational data and the curves in solid line are fitting of the scatter points using fifth-order polynomial function  $l = a_0 + a_1p + a_2p^2 + \dots$  to get a highly smooth  $l$ - $p$  curve.

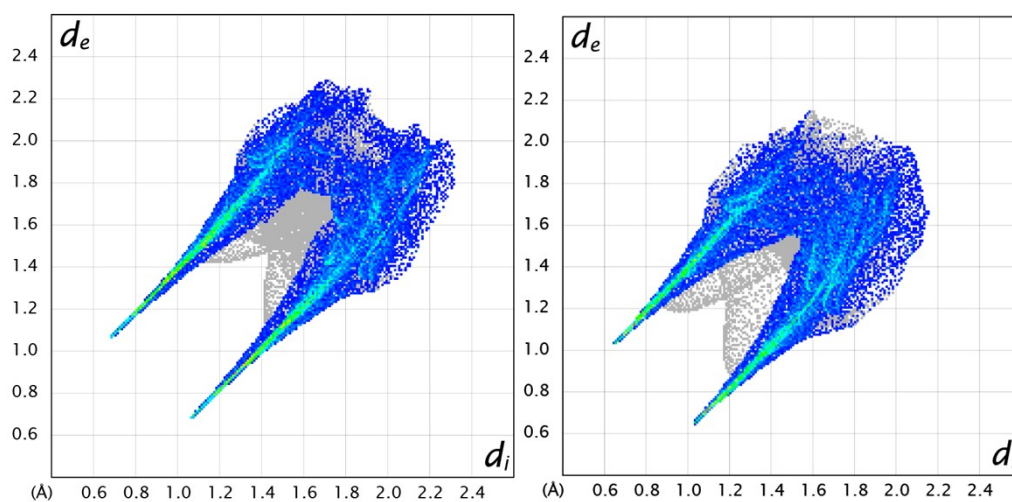

Fig. S2. The 2D fingerprint of N-H distance in BATZM at 0 (left) and 6 GPa (right).

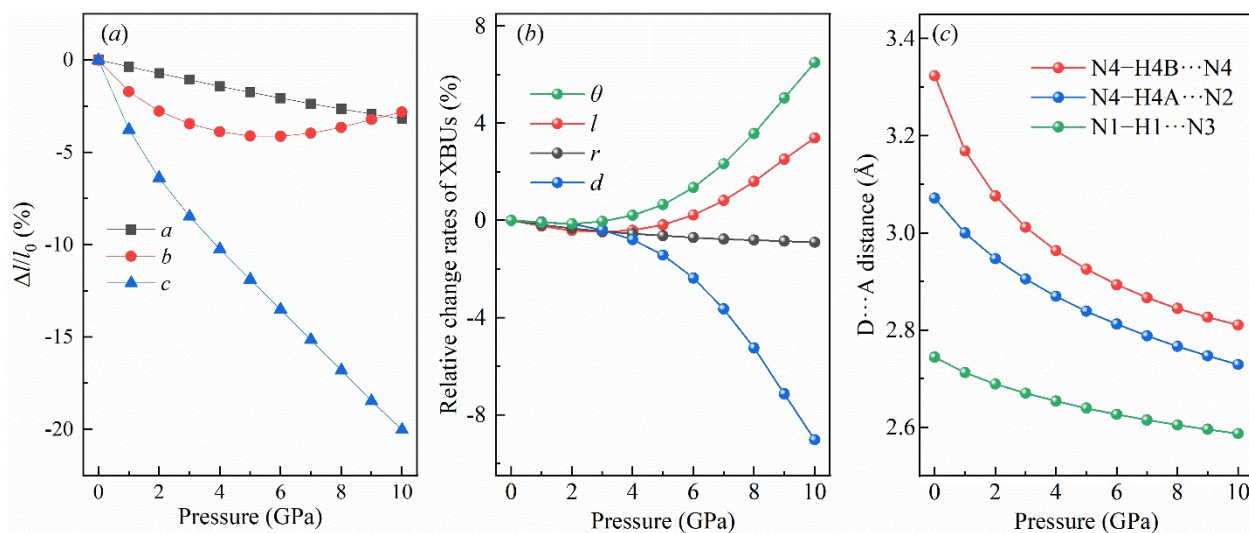

Fig. S3. Evolution of the relative change rate of (a) lattice parameters, (b) BBU parameters as a function of pressure. (c) Evolution of (b) D...A distance of hydrogen bonds as a function of pressure. All data are calculated by DFT-GGA without dispersion corrections.
